# Supplementary material for: Intermarriage and COVID-19 mortality among immigrants. A population-based cohort study from Sweden
Source: HighWire-hosted journal article supplement (doi:10.1136/bmjopen-2021-048952), 2021-08-31
Supplement: bmjopen-2021-048952supp001_data_supplement.pdf [file bmjopen-2021-048952supp001_data_supplement.pdf]

Supplementary table 1: Descriptive table displaying distributions of all covariables with and without missing in education and dwelling size.

|                                            | Study population (with missing education and dwelling size) | Study population (without missing education) | Study population (without missing dwelling size) |
|--------------------------------------------|-------------------------------------------------------------|----------------------------------------------|--------------------------------------------------|
| <b>Couple dyads</b>                        |                                                             |                                              |                                                  |
| Native-native                              | 75.31                                                       | 75.86                                        | 75.25                                            |
| Native-immigrant                           | 6.18                                                        | 6.21                                         | 6.19                                             |
| Immigrant-native                           | 6.09                                                        | 5.99                                         | 6.09                                             |
| Immigrant-immigrant                        | 12.42                                                       | 11.94                                        | 12.47                                            |
| <b>Sex</b>                                 |                                                             |                                              |                                                  |
| Man                                        | 50.26                                                       | 50.21                                        | 50.26                                            |
| Woman                                      | 49.74                                                       | 49.79                                        | 49.74                                            |
| <b>Education</b>                           |                                                             |                                              |                                                  |
| Primary                                    | 14.89                                                       | 15.01                                        | 14.91                                            |
| Secondary                                  | 42.59                                                       | 42.95                                        | 42.58                                            |
| Post-secondary                             | 41.68                                                       | 42.04                                        | 41.66                                            |
| Missing                                    | 0.85                                                        |                                              | 0.85                                             |
| <b>Income HH disposable Inc (tertiles)</b> |                                                             |                                              |                                                  |
| 1                                          | 32.53                                                       | 32.22                                        | 32.58                                            |
| 2                                          | 33.72                                                       | 33.85                                        | 33.73                                            |
| 3                                          | 33.75                                                       | 33.93                                        | 33.69                                            |
| <b>Housing type</b>                        |                                                             |                                              |                                                  |
| Multi-family dwelling                      | 32.38                                                       | 32.11                                        | 32.64                                            |
| Single-family dwelling                     | 67.18                                                       | 67.47                                        | 66.91                                            |
| Care home                                  | 0.44                                                        | 0.42                                         | 0.45                                             |
| <b># of individuals in the household</b>   |                                                             |                                              |                                                  |
| 2                                          | 52.46                                                       | 52.47                                        | 52.50                                            |
| 3                                          | 15.52                                                       | 15.50                                        | 15.53                                            |
| 4                                          | 21.97                                                       | 22.02                                        | 21.93                                            |
| 5+                                         | 10.05                                                       | 10.01                                        | 10.04                                            |
| <b>Sqm per person</b>                      |                                                             |                                              |                                                  |
| 0                                          | 8.21                                                        | 8.08                                         | 8.28                                             |
| -20                                        | 20.55                                                       | 20.50                                        | 20.71                                            |
| -30                                        | 23.04                                                       | 23.04                                        | 23.23                                            |
| -40                                        | 28.45                                                       | 28.54                                        | 28.69                                            |
| -60                                        | 18.94                                                       | 19.03                                        | 19.10                                            |
| Missing                                    | 0.81                                                        | 0.81                                         |                                                  |
| <b>Immigrants in DeSO</b>                  |                                                             |                                              |                                                  |
| 0                                          | 32.97                                                       | 33.15                                        | 32.77                                            |
| .1-                                        | 23.81                                                       | 23.88                                        | 23.82                                            |
| .15-                                       | 16.63                                                       | 16.64                                        | 16.70                                            |
| .2-                                        | 14.03                                                       | 14.01                                        | 14.09                                            |
| .3-                                        | 8.81                                                        | 8.72                                         | 8.86                                             |
| .5-                                        | 3.73                                                        | 3.61                                         | 3.76                                             |
| <b>Region of residence</b>                 |                                                             |                                              |                                                  |
| Stockholms län                             | 21.11                                                       | 21.01                                        | 21.13                                            |

|                      |       |       |       |
|----------------------|-------|-------|-------|
| Uppsala län          | 3.57  | 3.57  | 3.57  |
| Södermanlands län    | 2.91  | 2.92  | 2.90  |
| Östergötlands län    | 4.64  | 4.65  | 4.65  |
| Jönköpings län       | 3.73  | 3.74  | 3.73  |
| Kronobergs län       | 2.05  | 2.04  | 2.05  |
| Kalmar län           | 2.60  | 2.60  | 2.60  |
| Gotlands län         | 0.59  | 0.60  | 0.59  |
| Blekinge län         | 1.68  | 1.68  | 1.67  |
| Skåne län            | 13.24 | 13.20 | 13.24 |
| Hallands län         | 3.59  | 3.60  | 3.59  |
| Västra Götalands län | 16.71 | 16.73 | 16.75 |
| Värmlands län        | 2.89  | 2.88  | 2.89  |
| Örebro län           | 2.95  | 2.96  | 2.95  |
| Västmanlands län     | 2.74  | 2.74  | 2.75  |
| Dalarnas län         | 2.95  | 2.96  | 2.93  |
| Gävleborgs län       | 2.89  | 2.91  | 2.90  |
| Västernorrlands län  | 2.56  | 2.57  | 2.56  |
| Jämtlands län        | 1.29  | 1.30  | 1.28  |
| Västerbottens län    | 2.75  | 2.76  | 2.73  |
| Norrbottnens län     | 2.56  | 2.57  | 2.54  |

Supplementary table 2: Regression results for the risk of dying from COVID-19, other causes of death during the pandemic, and all-cause mortality in the year prior to the pandemic by couple dyad

|                         | Model 1: Figure 2A |        |                                     |        |                                    |        | Model 2: Figure 2B |        |                                     |        |                                    |        |
|-------------------------|--------------------|--------|-------------------------------------|--------|------------------------------------|--------|--------------------|--------|-------------------------------------|--------|------------------------------------|--------|
|                         | COVID- 19          |        | Other COD Mar 5, 2020- Feb 23, 2021 |        | All COD Mar 5, 2019 – Feb 23, 2020 |        | COVID- 19          |        | Other COD Mar 5, 2020- Feb 23, 2021 |        | All COD Mar 5, 2019 – Feb 23, 2020 |        |
|                         | HR                 | 95% CI | HR                                  | 95% CI | HR                                 | 95% CI | HR                 | 95% CI | HR                                  | 95% CI | HR                                 | 95% CI |
| <b>Partnership type</b> |                    |        |                                     |        |                                    |        |                    |        |                                     |        |                                    |        |
| Native-native           | 1.00               | 1.00   | 1.00                                | 1.00   | 1.00                               | 1.00   | 1.00               | 1.00   | 1.00                                | 1.00   | 1.00                               | 1.00   |
|                         |                    | (1.25, |                                     | (1.02, |                                    | (1.05, |                    | (1.02, |                                     | (0.98, |                                    | (1.00, |
| Native-immigrant        | 1.40               | 1.58)  | 1.07                                | 1.13)  | 1.10                               | 1.15)  | 1.15               | 1.29)  | 1.03                                | 1.08)  | 1.05                               | 1.10)  |
|                         |                    | (1.33, |                                     | (0.95, |                                    | (1.05, |                    | (1.10, |                                     | (0.93, |                                    | (1.02, |
| Immigrant-native        | 1.50               | 1.69)  | 1.00                                | 1.06)  | 1.11                               | 1.16)  | 1.24               | 1.40)  | 0.98                                | 1.03)  | 1.07                               | 1.12)  |
|                         |                    | (2.27, |                                     | (1.04, |                                    | (1.00, |                    | (1.29, |                                     | (0.85, |                                    | (0.83, |
| Immigrant-immigrant     | 2.47               | 2.69)  | 1.08                                | 1.13)  | 1.04                               | 1.09)  | 1.43               | 1.58)  | 0.90                                | 0.94)  | 0.87                               | 0.91)  |
| Years under risk        | 3,759,610          |        | 3,759,610                           |        | 3,764,370                          |        | 3,759,610          |        | 3,759,610                           |        | 3,764,370                          |        |
| N events                | 4564               |        | 30,374                              |        | 31,653                             |        | 4564               |        | 30,374                              |        | 31,653                             |        |
| N                       | 3,963,356          |        | 3,963,356                           |        | 3,966,345                          |        | 3,963,356          |        | 3,963,356                           |        | 3,966,345                          |        |

Model 1 includes adjustments for sex; Model 2 includes adjustments for sex, household income, education, housing type, number of individuals in the household, m<sup>2</sup>/person in the household (crowdedness), share of immigrants in the neighborhood of residence, and region of residence

Supplementary table 3: Regression results for the risk of dying from COVID-19, other causes of death during the pandemic, and all-cause mortality in the year prior to the pandemic by couple dyad disaggregated by LMIC and HIC immigrants.

|                         | Model 3: Figure 3A |              |                                     |              |                                    |              | Model 4: Figure 3B |              |                                     |              |                                    |              |
|-------------------------|--------------------|--------------|-------------------------------------|--------------|------------------------------------|--------------|--------------------|--------------|-------------------------------------|--------------|------------------------------------|--------------|
|                         | COVID- 19          |              | Other COD Mar 5, 2020- Feb 23, 2021 |              | All COD Mar 5, 2019 – Feb 23, 2020 |              | COVID- 19          |              | Other COD Mar 5, 2020- Feb 23, 2021 |              | All COD Mar 5, 2019 – Feb 23, 2020 |              |
|                         | HR                 | 95% CI       | HR                                  | 95% CI       | HR                                 | 95% CI       | HR                 | 95% CI       | HR                                  | 95% CI       | HR                                 | 95% CI       |
| <b>Partnership type</b> |                    |              |                                     |              |                                    |              |                    |              |                                     |              |                                    |              |
| Native-native           | 1.00               | 1.00         | 1.00                                | 1.00         | 1.00                               | 1.00         | 1.00               | 1.00         | 1.00                                | 1.00         | 1.00                               | 1.00         |
| Native-immigrant        | 1.41               | (1.25, 1.58) | 1.07                                | (1.02, 1.13) | 1.10                               | (1.05, 1.15) | 1.16               | (1.03, 1.30) | 1.03                                | (0.98, 1.08) | 1.04                               | (0.99, 1.09) |
| HIC-native              | 1.44               | (1.27, 1.64) | 1.01                                | (0.96, 1.07) | 1.13                               | (1.07, 1.19) | 1.23               | (1.08, 1.40) | 0.99                                | (0.94, 1.05) | 1.11                               | (1.05, 1.16) |
| HIC-immigrant           | 1.54               | (1.34, 1.77) | 1.13                                | (1.07, 1.20) | 1.09                               | (1.03, 1.16) | 1.11               | (0.97, 1.28) | 1.01                                | (0.95, 1.07) | 0.97                               | (0.91, 1.02) |
| LMIC-native             | 1.91               | (1.42, 2.57) | 0.95                                | (0.83, 1.09) | 0.96                               | (0.84, 1.09) | 1.35               | (1.00, 1.82) | 0.85                                | (0.74, 0.98) | 0.84                               | (0.74, 0.97) |
| LMIC-immigrant          | 3.60               | (3.25, 3.99) | 1.03                                | (0.97, 1.10) | 0.99                               | (0.93, 1.06) | 1.84               | (1.62, 2.09) | 0.77                                | (0.72, 0.83) | 0.75                               | (0.70, 0.81) |
| Years under risk        | 3,759,610          |              | 3,759,610                           |              | 3,764,370                          |              | 3,759,610          |              | 3,759,610                           |              | 3,764,370                          |              |
| N events                | 4564               |              | 30,374                              |              | 31,653                             |              | 4564               |              | 30,374                              |              | 31,653                             |              |
| N                       | 3,963,356          |              | 3,963,356                           |              | 3,966,345                          |              | 3,963,356          |              | 3,963,356                           |              | 3,966,345                          |              |

Model 3 includes adjustments for sex; Model 4 includes adjustments for sex, household income, education, housing type, number of individuals in the household, m<sup>2</sup>/person in the household (crowdedness), share of immigrants in the neighborhood of residence, and region of residence

Supplementary figure 1: Hazard Ratios for the risk of dying from COVID-19 by couple dyad, including estimates from sensitivity analyses using multiple imputations to adjust for missing education and only complete cases

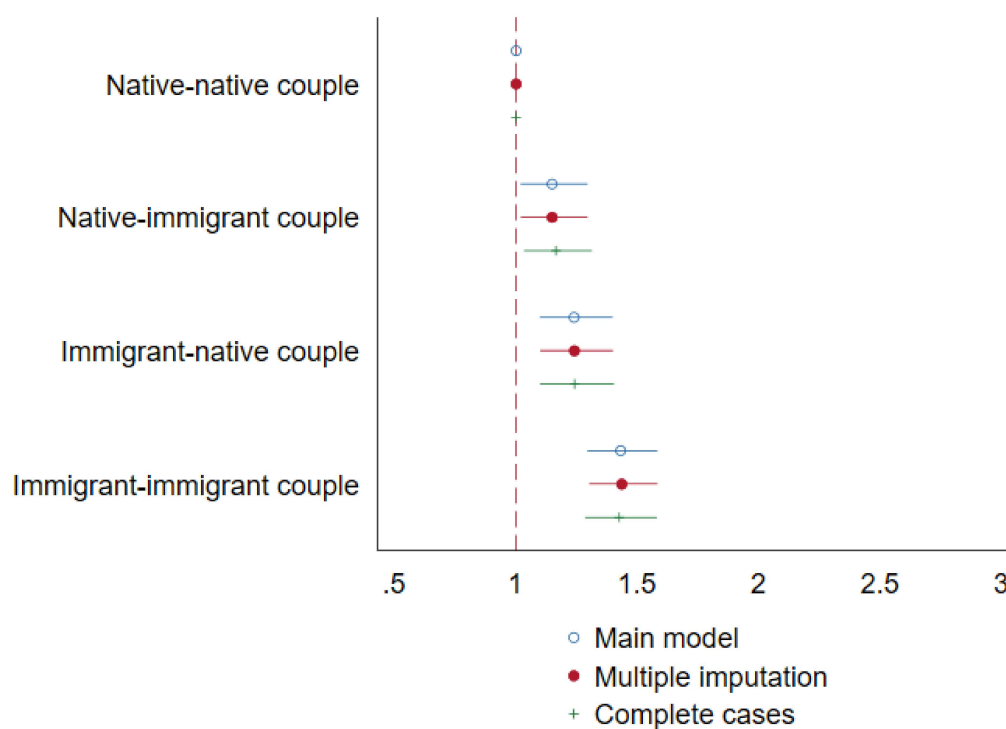

Supplementary figure 2: Hazard Ratios for the risk of dying from COVID-19, other causes of death during the pandemic, disaggregating native-immigrant couples by partner origin. Model includes full adjustment (reference group: native-native couples) (N=3,229,772)

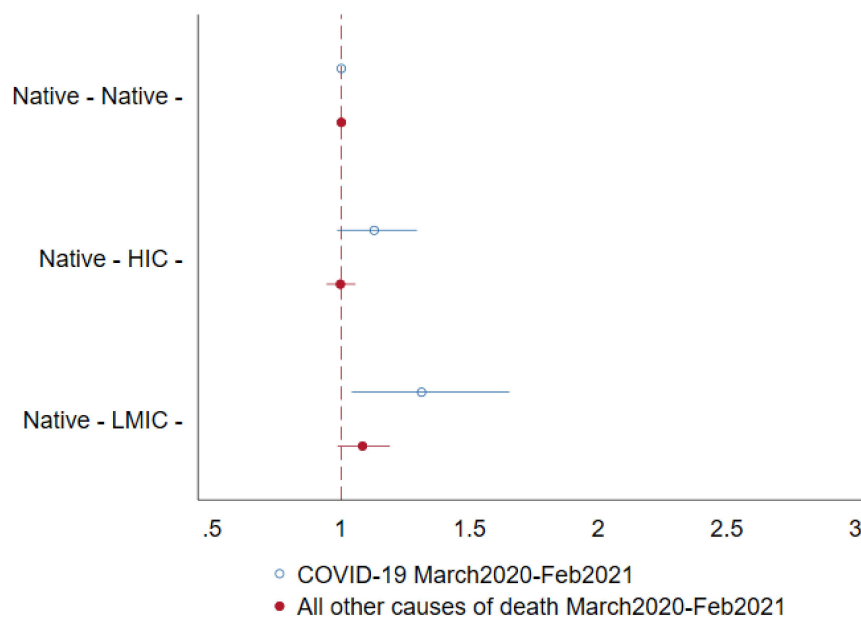

Supplementary figure 3: Hazard Ratios for the risk of dying from COVID-19 by couple dyads excluding second generation immigrants. Model includes full adjustment (reference group: native-native couples) (N= 3,593,764)

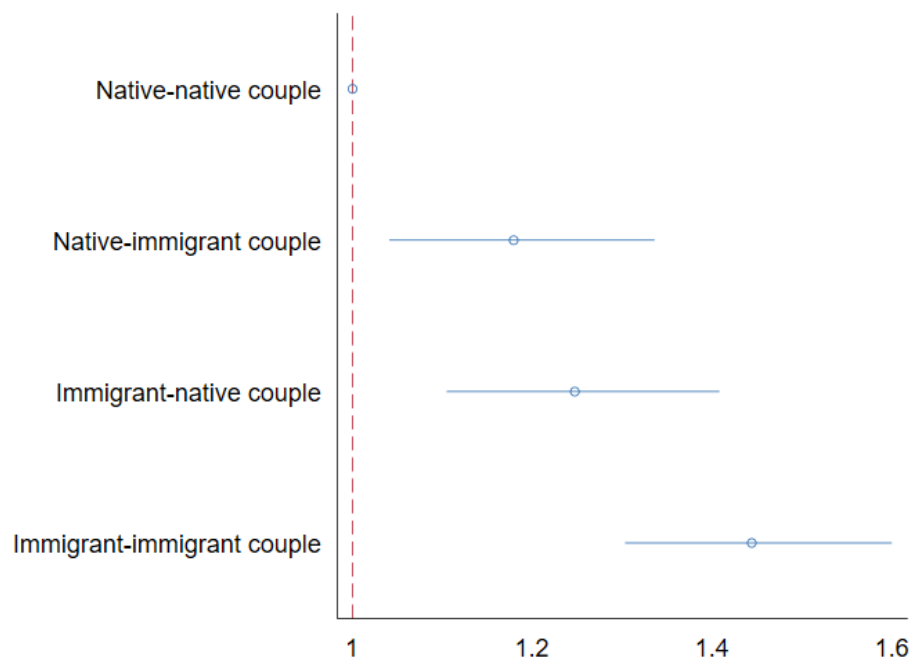



Supplementary figure 4: Hazard Ratios for (A) adjusted for age and sex only and (B) further adjusted associations between immigrant-native couple type (reference group: native-native couples), COVID-19 and all-cause mortality in 2020 in Stockholm, Sweden.

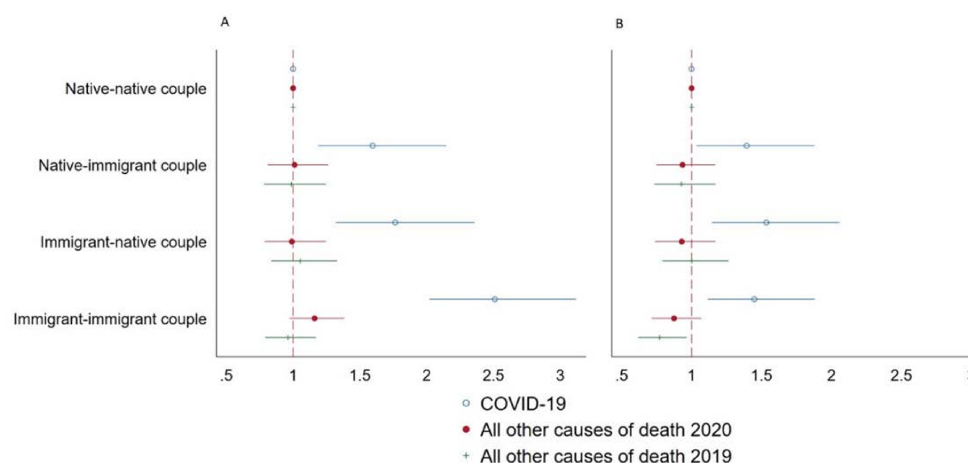

Note: This figure is based on data on all COVID-19 deaths during the period from March 12, 2020 to May 7, 2020 (149,622 person-years of observation, and 1,587 deaths).
